# Supplementary material
Source: PubMed Central journal article supplement (PMC2795533)
Supplement: 0909176106_0909176106SI.pdf [file 0909176106_0909176106SI.pdf]

# Supporting Information

Azevedo et al. 10.1073/pnas.0909176106

## SI Experimental Procedures

**Antibodies.** Antibodies used in this study were as follows: goat anti-AP3B1 (Santa Cruz Biotechnology), goat anti-AP3D1 (Santa Cruz), rabbit anti-Kif3A (Abcam), mouse monoclonal anti-HA (Clone HA-7; Sigma), mouse monoclonal anti-Myc (Clone 4A6; Millipore; Upstate), goat anti-actin (Santa Cruz Biotechnology), mouse anti-HSP60 (Calbiochem), mouse anti-HIV-1 p24 [EVA365, EVA366; National Institute for Biological Standards and Control (NIBSC) Centre for AIDS Reagents], rabbit anti-glutathione-S-transferase (anti-GST; Sigma).

**Expression Constructs.** Unless otherwise stated all cDNAs are full-length. All of the constructs used in this study, except NSR1, IP6K1, and mKif3A, encode human proteins with the following accession numbers: NP003655 (AP3B1); NP008985 (Kif3A); NP066267 (Ankyrin); and NP005372 (Nucleolin). The NSR1 encodes a yeast protein (CAA59817) and mKif3A encodes a mouse protein (NP032469). Plasmids for expression in yeast cells were cloned as follows: (i) The yeast two-hybrid bait pGBKT7-AP3B1 (576–902) was cloned into the *Bam*HI and *Pst*I sites of pGBKT7 (Clontech); (ii) pADH:GST vector was engineered by replacing the *Gal*I promoter from pYesGST (1) with the ADH1 promoter using the *Hind*III and *Bam*HI cloning sites, and all derived constructs were cloned into the *Sal*I and *Not*I sites—GST-AP3B1, GST-AP3B1 (1–676), GST-AP3B1 (1–706), GST-AP3B1 (576–902), GST-AP3B1 (576–706), GST-AP3B1 (576–686), GST-AP3B1 (576–691), GST-AP3B1 (707–774), GST-AP3B1 (775–882), GST-NSR1, GST-Nucleolin, GST-Kif3A; and (iii) HA-Kif3A (601–702) and HA-ANK (3,864–4,082) in pACT2 (Clontech) were obtained from the YTH screen. Plasmids for expression in mammalian cells were cloned as follows: (i) Constructs in pCMV-GST (2) were cloned into the *Sal*I and *Not*I sites—GST-AP3B1, GST-AP3B1(577–1094), GST-Kif3A; and (ii) constructs in pCMV-Myc (Clontech) were cloned into the *Sal*I and *Not*I sites—Myc-AP3B1, Myc-AP3B1 (576–902), Myc-Kif3A, Myc-Kif3A (1–342) and Myc-Kif3A (354–702), Myc-mKif3A (1–701), Myc-IP<sub>6</sub>K1 (mouse), Myc-IP<sub>6</sub>K1K/A (mouse), Myc-IP<sub>6</sub>K2 (human), Myc-IP<sub>6</sub>K2K/A (human) were described (3); constructs in pEGFP-C1 (Clontech) were cloned into the *Sac*II and *Xho*I sites—EGFP-AP3B1 and EGFP-Kif3A. For expression in *E. coli* (BL21), AP3B1 (576–902) was cloned into the *Sal*I and *Not*I sites of pGex-4T-2 (GE Healthcare), and Kif3A was cloned into pHisTrcA (Invitrogen). A plasmid expressing Gag-GFP (4) was kindly provided by Wes Sundquist (University of Utah, Salt Lake City, Utah).

**Yeast Strains and Yeast Two-Hybrid Screen.** The following yeast strains were used in this study: *kcs1Δ*, *vip1Δ*, and wild-type background DDY1810 (indicated as WT). Nontransformed yeast strains were grown in YPD media (Bacto Yeast extract, Bacto Peptone, Dextrose; Formedium), yeast strains transformed with pADH:GST vector were grown on SD-Ura<sup>-</sup> (minimum synthetic dropout medium without uracil; Formedium), and yeast strains transformed with pACT2 vector (Clontech) were grown on SD-Leu<sup>-</sup> (SD without leucine; Formedium). Yeast transformations were performed using the lithium acetate method according to Matchmaker Gal4 Two-Hybrid System 3 (Clontech). YTH screen was performed in the yeast strain AH109 (Clontech) using pGBKT7-AP3B1 (576–902) as bait and a human fetal brain MATCHMAKER cDNA library as a prey (pACT2 based library; Clontech). The screening was performed according to the manufacturer's instructions (Clontech), and

$3.5 \times 10^6$  independent clones were screened. Positive clones were retransformed with the bait into AH109 and grown on SD-LT<sup>-</sup> media (SD without leucine and tryptophan) to assess growth and in SD-LTHA<sup>-</sup> (SD without leucine, tryptophan, histidine, and adenine) to assess interaction.

**RNA Interference.** Twenty-one-nucleotide validated siRNA duplexes corresponding to siRNA-Kif3A (AAGACCTGATGTGGGAGTTTA), and negative control AllStars control siRNA (Qiagen) were used in the silencing experiments. siRNAs (120  $\mu$ M) were transfected per well of a 24-well plate. Twenty-four hours after the initial transfection, cells were retransfected with the same amount of siRNA and subsequently split. Seventy-two hours after the initial transfection, cells were transfected with Gag-GFP. Cells and VLPs were collected 16–18 h later.

**Mammalian Cell Cultures and Transfections.** HeLa and MEF cells were cultured in Dulbecco's modified Eagle's medium (DMEM; Gibco) supplemented with 10% (vol/vol) FBS, 1% (vol/vol) penicillin/streptomycin. HeLa cells were transfected with Lipofectamine 2000 reagent (Invitrogen) according to manufacturer's instructions. Transfected HeLa cells were harvested 24 h later, and the proteins extracted accordingly. MEF cells were transfected with FuGENE HD (Roche) according to manufacturer's instructions. Forty-eight hours after transfection, cells were harvested, and the proteins extracted accordingly.

**Purification of GST-AP3B1 from *E. coli*.** For GST purification from *E. coli*, GST-AP3B1 (576–902) was transformed into the strain BL21. Cell cultures were induced for 4 h at 37 °C with 1 M IPTG to a final concentration of 1 mM. Cells were pelleted by centrifugation at 5,000 rpm for 15 min at 4 °C, washed, and resuspended in 12 mL ice-cold GST lysis buffer [20 mM HEPES, pH 6.8, 100 mM NaCl, 1 mM EDTA, 1 mM EGTA, 0.1% CHAPS, 5 mM DTT, and 1/500 protease inhibitor mixture (PIC; Sigma)]. The cells were lysed by sonication and clarified by centrifugation at 10,000 rpm for 20 min at 4 °C. The supernatant was incubated with 1 mL 50% glutathione beads slurry (pre-equilibrated in GST lysis buffer) and 1% Triton X-100 for 2 h at 4 °C. Beads were washed three times in GST wash buffer (50 mM Tris·HCl, pH 7.4, 500 mM NaCl, 2 mM EDTA, 1% Triton X-100) and equilibrated twice in GST lysis buffer.

**Protein Extraction, Immunoprecipitations, and GST-Pull Downs.** For the phosphorylation assays with yeast protein extracts, proteins were extracted in IP<sub>7</sub> phosphorylation buffer (20 mM HEPES, pH 6.8, 5 mM DTT, 1 mM EGTA, 1 mM EDTA, 0.1% CHAPS, 200  $\mu$ g/mL PMSF, and 1/500 PIC). For yeast protein analyses or GST pull-down experiments with yeast proteins extracts, proteins were extracted in the following extraction buffer (50 mM Tris, pH 7.6, 100 mM NaCl, 5 mM EDTA, 5% glycerol, 5 mM DTT, 1/500 PIC). In all cases, yeast protein were extracted through vortexing with glass beads. Cleared cell homogenates were either immediately boiled in sample buffer or normalized and used for pull-down experiments. During the experiments in which gel mobility shift was being analyzed, it was crucial that the protein samples were rapidly processed, since the shift associated with IP<sub>7</sub>-mediated pyrophosphorylation is unstable. For GST pull-downs from yeast extracts, glutathione beads were incubated with protein extracts for 2 h at 4 °C and washed three times in the lysis buffer containing 1% Nonidet P-40. The beads were resuspended in 2 $\times$  LDS sample buffer and boiled. For all of the

assays with mammalian protein extracts, except the immunoprecipitations, proteins were extracted in hypotonic buffer (10 mM Tris-HCl, pH 7.5, 10 mM NaCl, 2 mM EDTA, 0.5% Triton X-100, 1 mM PMSF, 1/500 PIC) for 10 min on ice, after which NaCl was added to a final concentration of 150 mM, and the cells were incubated on ice for a further 5 min. For AP3B1 immunoprecipitations from MEF cells, proteins were extracted in nondenaturing lysis buffer (20 mM Tris-HCl, pH 8.0, 137 mM NaCl, 10% glycerol, 1% Nonidet P-40, 2 mM EDTA, 1/500 PIC). Protein extract (400  $\mu$ g) was precleared with protein G-agarose (Sigma). Cleared extracts were incubated with 2  $\mu$ g anti-AP3B1 antibody overnight at 4 °C, after which protein G-agarose

(Sigma) was added and incubated for 4 h further. The beads were washed in lysis buffer, resuspended in 2 $\times$  LDS sample buffer, and boiled.

**Relative Protein Quantification.** Quantification of protein bands intensities was performed with Quantity One program (version 4.6.5; Bio-Rad Laboratories) on scanned X-ray films (GS-800 calibrated densitometer scanner; Bio-Rad Laboratories).

**SAX-HPLC Inositol Polyphosphates Analysis.** Analysis of inositol polyphosphates from yeast or mammalian cells was performed as described in ref. 5.

1. Bhandari R, et al. (2007) Protein pyrophosphorylation by inositol pyrophosphates is a posttranslational event. *Proc Natl Acad Sci USA* 104:15305–15310.
2. Tsai RY, Reed RR (1997) Using a eukaryotic GST fusion vector for proteins difficult to express in *E. coli*. *Biotechniques* 23:794–800.
3. Illies C, et al. (2007) Requirement of inositol pyrophosphates for full exocytotic capacity in pancreatic beta cells. *Science* 318:1299–1302.
4. Hermida-Matsumoto L, Resh MD (2000) Localization of human immunodeficiency virus type 1 Gag and Env at the plasma membrane by confocal imaging. *J Virol* 74:8670–8679.
5. Azevedo C, Saiardi A (2006) Extraction and analysis of soluble inositol polyphosphates from yeast. *Nat Protoc* 1:2416–2422.
6. Dubois E, et al. (2002) In *Saccharomyces cerevisiae*, the inositol polyphosphate kinase activity of Kcs1p is required for resistance to salt stress, cell wall integrity, and vacuolar morphogenesis. *J Biol Chem* 277:23755–23763.
7. Saiardi A, Caffrey JJ, Snyder SH, Shears SB (2000) The inositol hexakisphosphate kinase family. Catalytic flexibility and function in yeast vacuole biogenesis. *J Biol Chem* 275:24686–24692.
8. Mulugu S, et al. (2007) A conserved family of enzymes that phosphorylate inositol hexakisphosphate. *Science* 316:106–109.

A

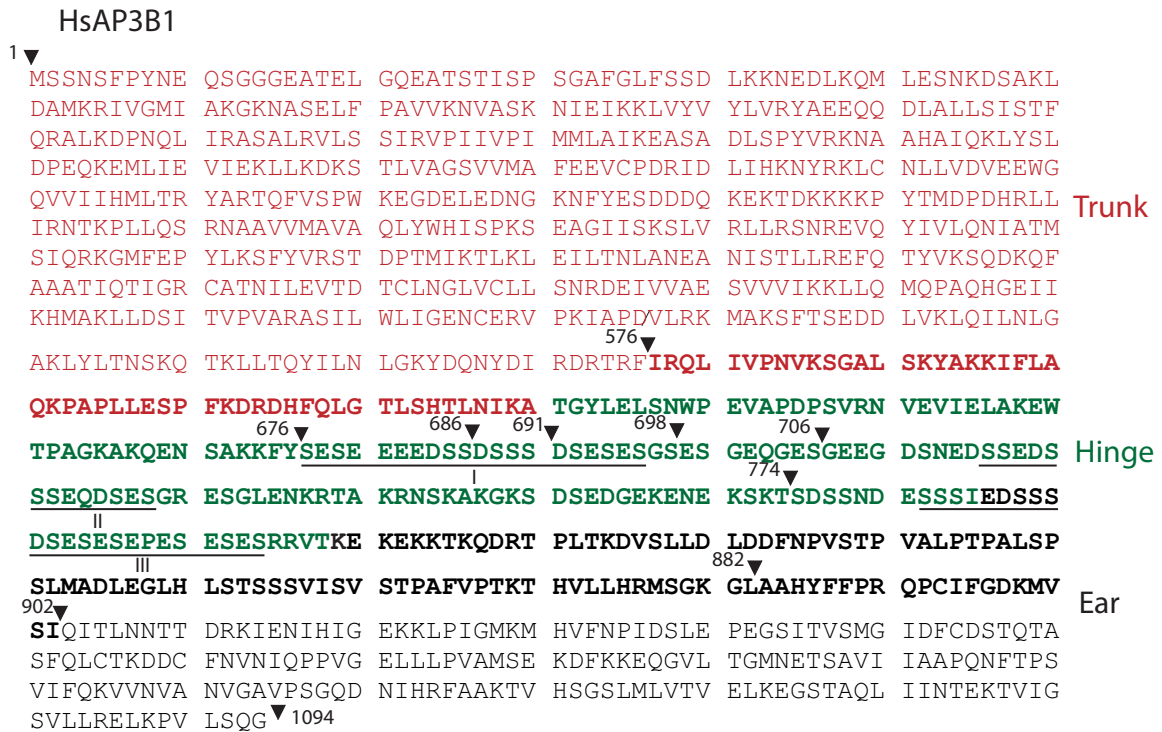

B

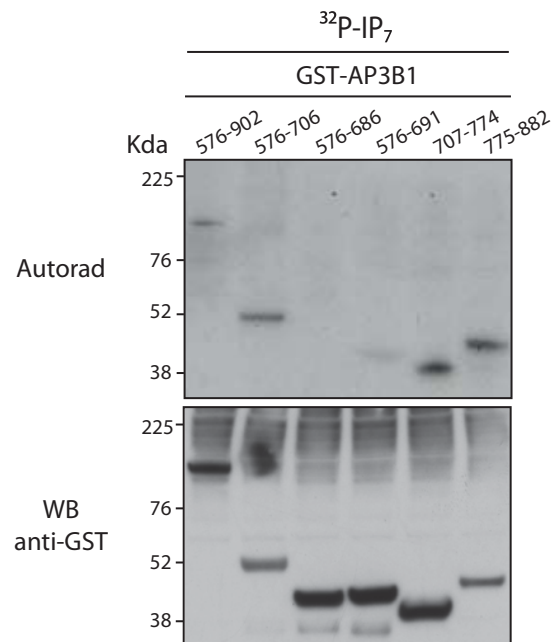

**Fig. S1.** Protein sequence of human AP3B1. AP3B1 is composed of three main domains: (A) The N-terminal head domain (in red), the hinge (in green), and the C-terminal ear domain (in black). The region used as bait for the yeast two-hybrid screening (576-902; represented in bold) contains the three acidic serine-rich regions that correspond to the putative target of IP<sub>7</sub> phosphorylation (regions I-III). (B) AP3B1 acidic regions are targets of IP<sub>7</sub>-mediated pyrophosphorylation. Protein extracts of */kcs1/D* yeast expressing different GST-AP3B1 derivatives were treated as in Fig. 1B.

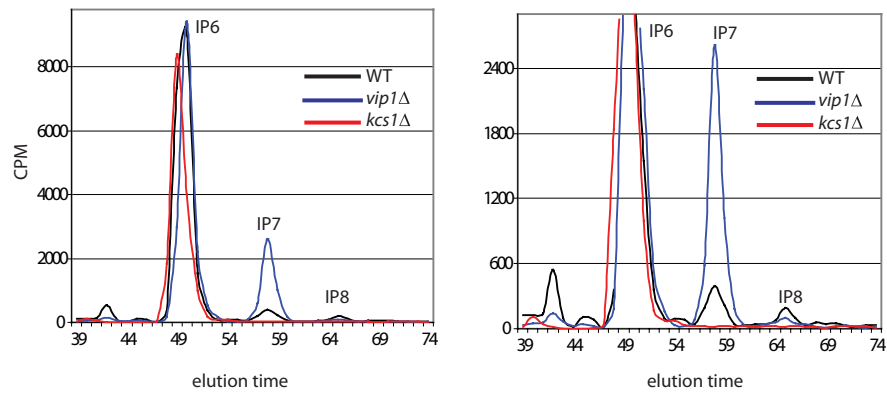

**Fig. S2.** Yeast *vip1Δ* single mutant accumulate IP<sub>7</sub>. SAX-HPLC analyses of inositol phosphates in [<sup>3</sup>H]inositol-labeled yeast (5) wild-type (WT), the mutants *kcs1Δ* (6, 7), and VIP1 (8) deleted strain *vip1Δ*.

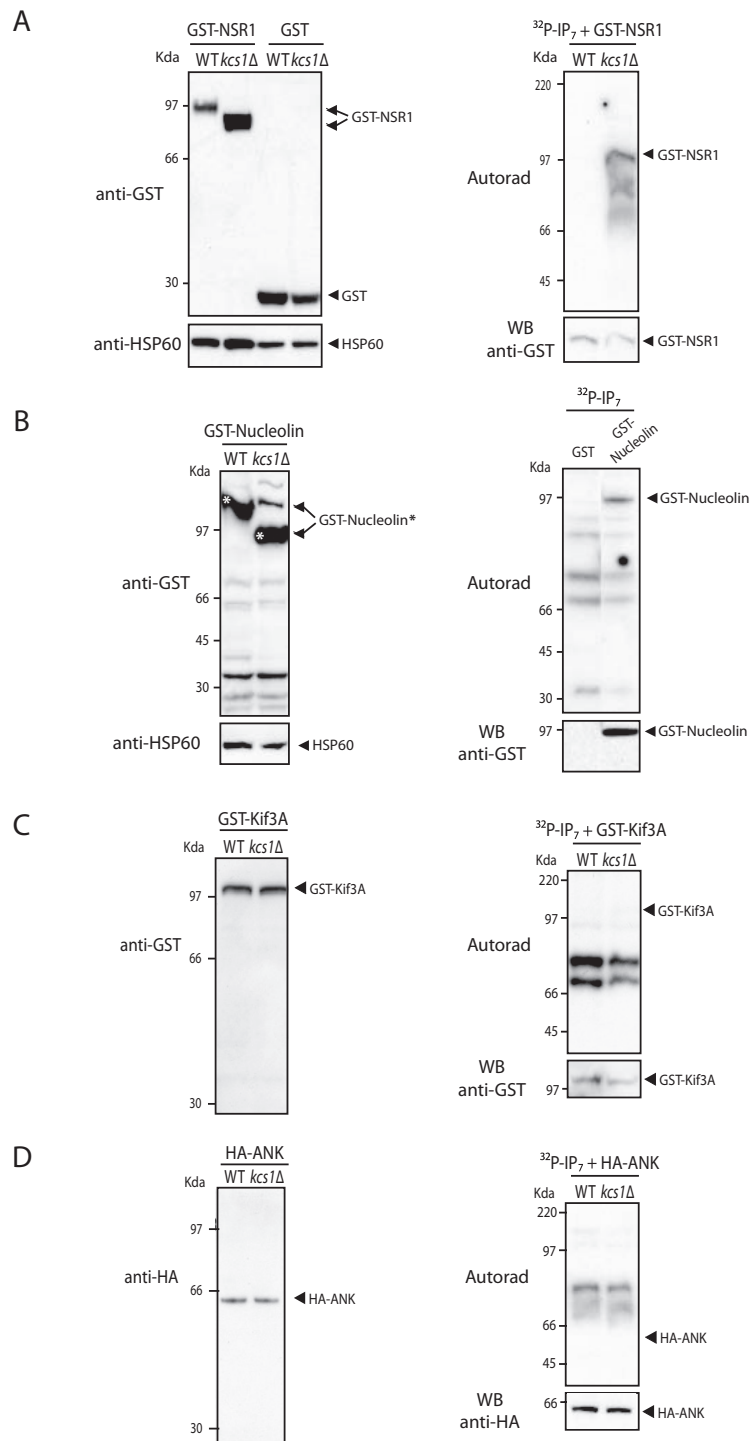

**Fig. S3.** Gel mobility shift of known targets of IP<sub>7</sub>-mediated pyrophosphorylation. (A) Protein from WT and *kcs1Δ* yeast strains expressing: GST-NSR1 or empty GST vector control, were quickly extracted, resolved by NuPAGE (Invitrogen) and immunoblotted with anti-GST antibody (Left). IP<sub>7</sub> pyrophosphorylation assays were performed as described in the *Materials and Methods* section (Right). The level of in vitro pyrophosphorylation of GST-NSR1 is undetectable in WT cell due to endogenous pyrophosphorylation (see main text Fig. 1D). (B) Yeast expressing GST-Nucleolin was treated as in A. (C) Yeast expressing GST-Kif3A was treated as in A, the Left show that Kif3A is not pyrophosphorylated by IP<sub>7</sub>. (D) Yeast expressing human ankyrin [HA-ANK (3864–4082)] was treated as in A, the Left show that ankyrin is not pyrophosphorylated by IP<sub>7</sub>.

## HsKif3A

1 ▼ MPINKSEKPE SCDNVKVVVR CRPLNEREKS MCYKQAVSVD EMRGITIVHK TDSSNEPPKT  
 FTFDTVFGPE SKQLDVYNLT ARPIIDSVLE GYNGTIFAYG QTGTGKTFTM EGVRAIPELR  
 GIIPNSFAHI FGHIAKAEGD TRFLVRVSYL EIYNEEVRDL LGKDQTQRLA VKERPDPGVY **Motor**  
 IKDLSAYVVN NADDMDRIMT LGHKNRVGA TNMNEHSSRS HAIFTITIEC SEKGIDGNMH  
 VRMGKLHLVD LAGSERQAKT GATGQRLKEA TKINLSLSTL GNVISALVDG KSTHVPYRNS  
 KLTRLLQDSL GGNSKTMMCA NIGPADYNYD ETISTLRYAN <sup>342</sup>▼ RAKNIKNKAR <sup>354</sup>▼ INEDPKDALL  
 RQFQKEIEEL KKKLEEGEEI SGSDISGSEE DDDEEGEVGE DGEKRKKRRI QIGKKKVSPD  
 KMIEMQAKID EERKALETKL DMEEEERNKA RAELEKREKD LLKAQQEHQS LLEKLSALEK **Non-Motor**  
 KVIVGGVDLL AKAEQEKLL EESNMELEER RKRAEQLRRE LEEKEQERLD IEEKYTSLQE  
 EAQGKTKKLL KVTMLMAAK SEMADLQEH QREIEGLLEN IRQLSRELRL QMLIIDNFIP  
 601 ▼ **RDYQEMIENY VHWNEDIGEW QLKCVAYTGN NMRKQTPVPD KKEKDPFEVD LSHVYLAYTE**  
**ESLRQSLMKL ERPRTSKGKA RPKTGRRKRS AKPETVIDSL LQ** ▼ 702

**Fig. S4.** Protein sequence of human Kif3A. Kif3A contains a highly conserved motor domain (in red) that binds to microtubules and hydrolyzes ATP and a stalk domain that interacts with other subunits of the kinesin-2 complex and with cargo molecules (in black). The amino acids encoded by the clone identified in the yeast two-hybrid screening with AP3B1 (576–902) as bait are represented in bold.



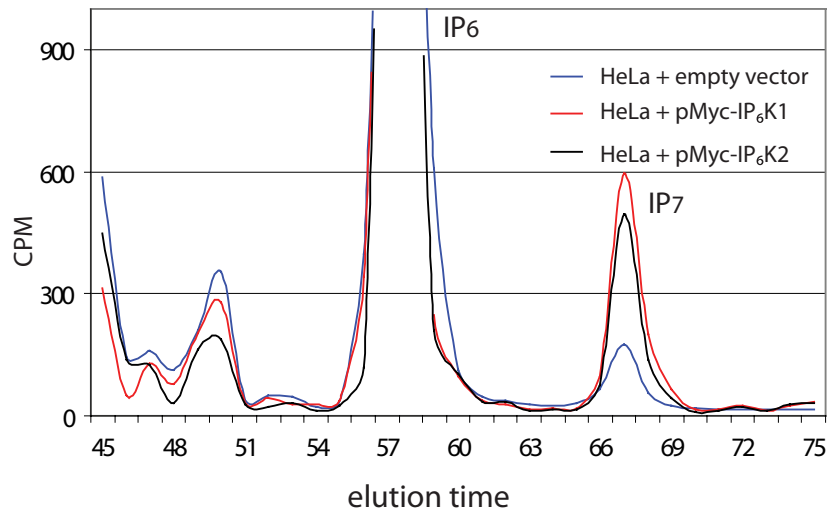

**Fig. S6.** SAX-HPLC analysis of IP<sub>6</sub>K1 and two overexpression in HeLa cells. Cells were labeled with [<sup>3</sup>H]inositol for 4 days (5) before transfection with empty vector, Myc-IP<sub>6</sub>K1, or Myc-IP<sub>6</sub>K2. Acidic extraction of soluble inositol polyphosphate was performed 48 h posttransfection, and inositol polyphosphates were analyzed by SAX-HPLC as described in ref. 5.
